# Supplementary material for: The influence of tamoxifen on normal mouse mammary gland homeostasis
Source: Springer Nature journal article supplement (doi:10.1186/s13058-014-0411-0), 2014-07-23

Day 1

Day 2

Day 3

Oil

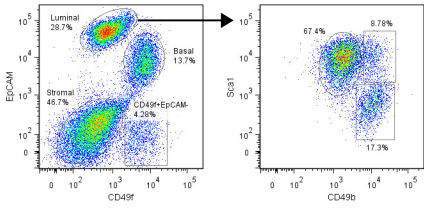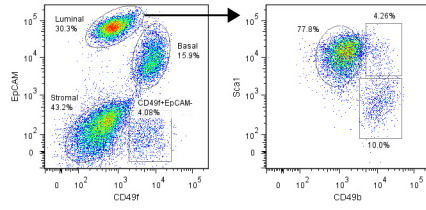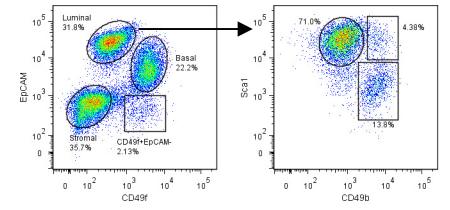

1 mg

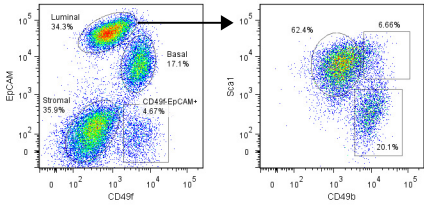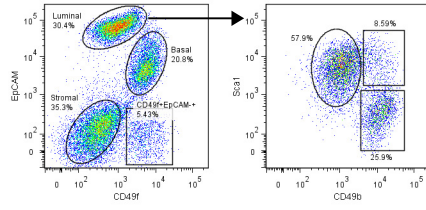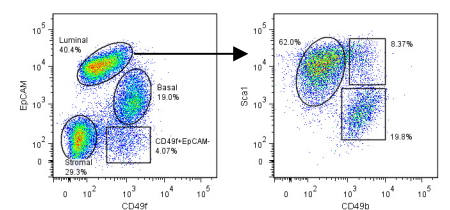

5 mg

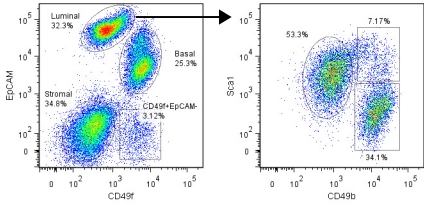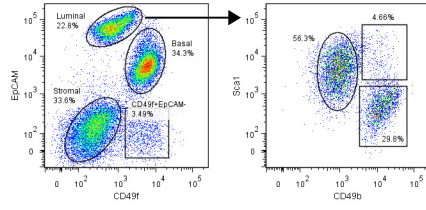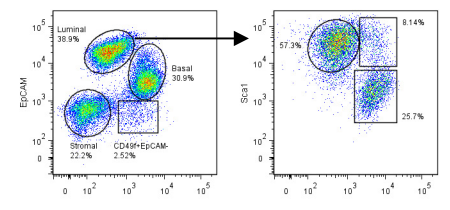

3\*5 mg

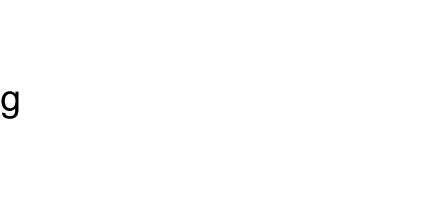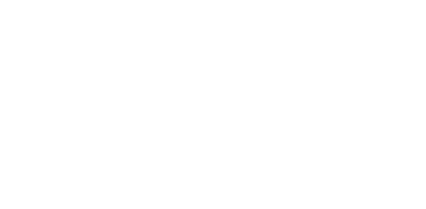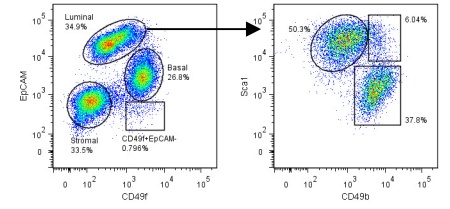

Day 7

Day 21

Day 56

Oil

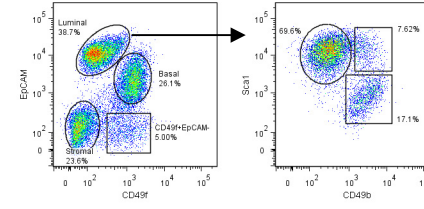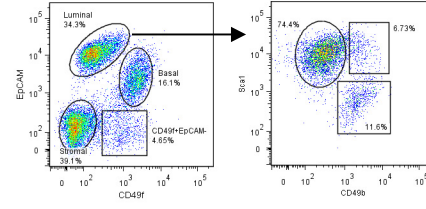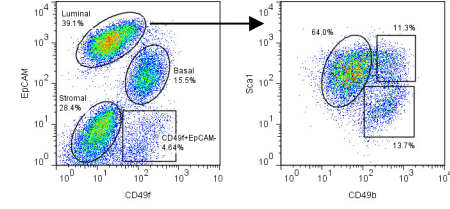

1 mg

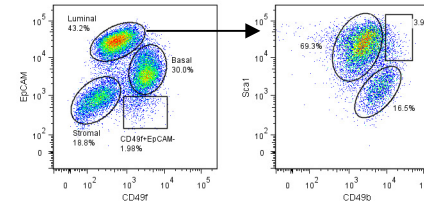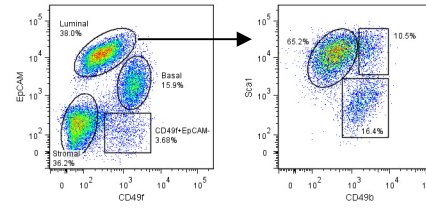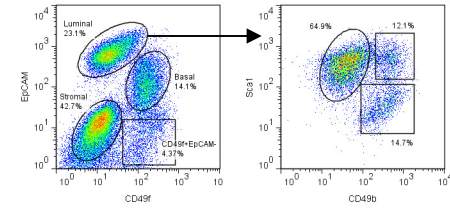

5 mg

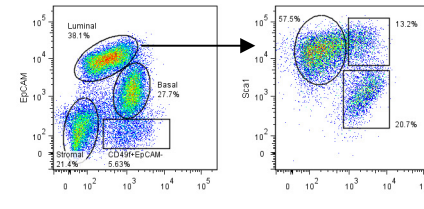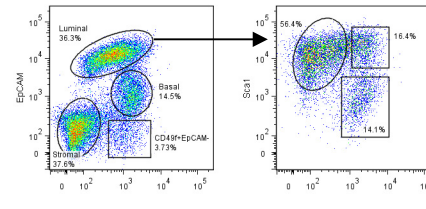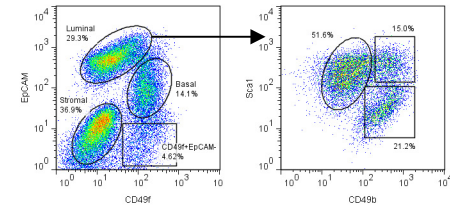

3\*5 mg

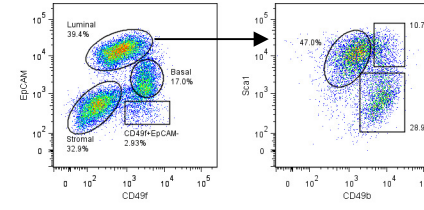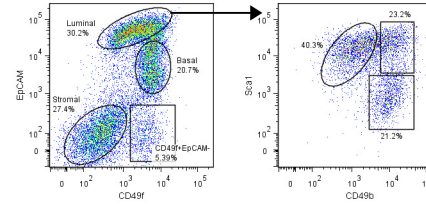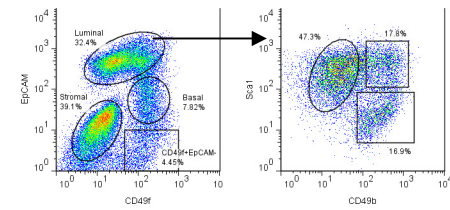

Supplement: MOESM3 [file 9781116]
