# Supplementary material for: The influence of tamoxifen on normal mouse mammary gland homeostasis
Source: PubMed Central journal article supplement (PMC4303226; doi:10.1186/s13058-014-0411-0), 2014-07-24

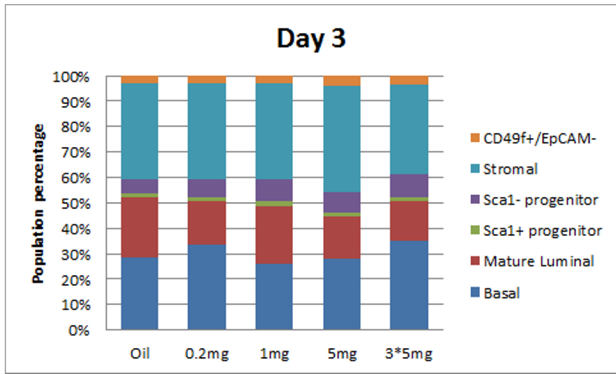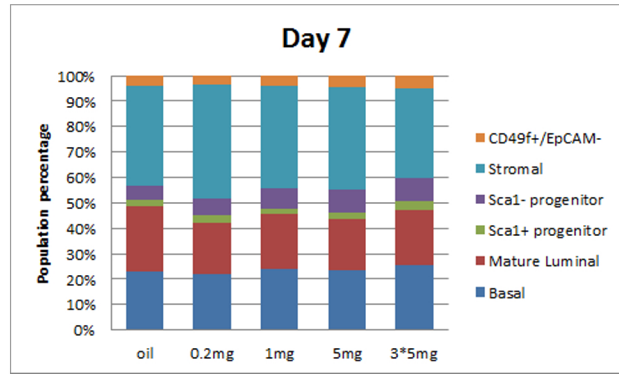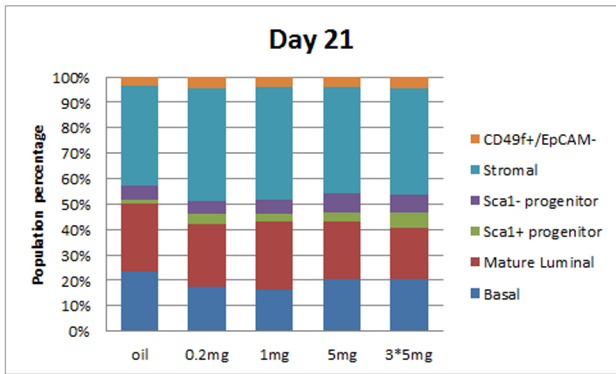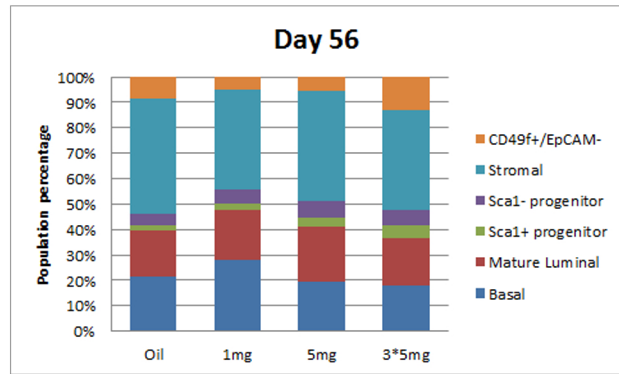

Supplement: 13058_2014_411_MOESM2_ESM.pdf [file 13058_2014_411_MOESM2_ESM.pdf]
