# Supplementary material for: The influence of tamoxifen on normal mouse mammary gland homeostasis
Source: PubMed Central journal article supplement (PMC4303226; doi:10.1186/s13058-014-0411-0), 2014-07-24
Supplement: 13058_2014_411_MOESM6_ESM.pdf [file 13058_2014_411_MOESM6_ESM.pdf]

**Table S2: Frequency and absolute number of MRUs in oil- and tamoxifen-treated mice.**

| Dose of tam | Cell dose | Take rate |        | % fat pad filled                               |                                                   | MRU frequency (95% CI)     |    |                          | MRUs/pair of glands |       |        |
|-------------|-----------|-----------|--------|------------------------------------------------|---------------------------------------------------|----------------------------|----|--------------------------|---------------------|-------|--------|
|             |           | Day 3     | Day 21 | Day 3                                          | Day 21                                            | Day 3                      |    | Day 21                   |                     | Day 3 | Day 21 |
| Oil control | 750       | 5/8       | 8/10   | 100, 100, 100, 75-100, <25                     | 75-100, 25-50, 75-100, 50, 50-75, 100, 100, 100   | 1/765<br>(1/1,904-1/308)   | ND | 1/467<br>(1/1,007-1/216) | ND                  | 3,399 | 5,139  |
| 1 mg        | 750       | 2/6       | 9/10   | 100, 100                                       | 25-50, 50, 100, 100, 100, 75-100, 50, 75-100, 100 | 1/1,850<br>(1/7,467-1/458) |    | 1/326<br>(1/731-1/146)   |                     | 1,155 | 6,173  |
| 5 mg        | 750       | 7/8       | 8/10   | 75-100, 50, 100, 75-100, 75-100, 25-50, 75-100 | 100, <25, 50, 50-75, 75-100, <25, 100, 50         | 1/361<br>(1/871-1/149)     |    | 1/467<br>(1/1,007-1/216) |                     | 4,467 | 2,489  |

ND = No significant difference
