# Supplementary material for: The influence of tamoxifen on normal mouse mammary gland homeostasis
Source: Springer Nature journal article supplement (doi:10.1186/s13058-014-0411-0), 2014-07-23
Supplement: MOESM1 [file 9781116]

Table S1: Summary of lineage-tracing studies in the mammary epithelium

| Reference                          | System used               | Total dose TAM received | Age of treatment |
|------------------------------------|---------------------------|-------------------------|------------------|
| <b><i>Mammary gland</i></b>        |                           |                         |                  |
| Van Keymeulen et al, 2011, Nature  | K18-CreER                 | 3x5 mg/mouse            | P28, P56         |
|                                    | K8-CreER                  | 3x5 mg/mouse            | P28, P56         |
|                                    | K5-CreER                  | 3x5 mg/mouse            | P28, P56         |
|                                    | Lgr5-CreER <sup>T2</sup>  | 3x5 mg/mouse            | P28, P56         |
| Van Amerongen et al., 2012, CSC    | Axin2-CreER <sup>T2</sup> | 1.5 mg/mouse            | P14              |
|                                    |                           | 2.5 mg/mouse            | P28              |
|                                    |                           | 4 mg/mouse              | P56              |
| De Visser et al, 2012, J Path.     | Lgr5-CreER <sup>T2</sup>  | 0.5 mg/mouse            | P1               |
|                                    |                           | 1.5 mg/mouse            | P12              |
|                                    | R26-CreER <sup>T2</sup>   | 0.5 mg/mouse            | P1               |
|                                    |                           | 1.5 mg/mouse            | P12              |
| <b><i>Skin</i></b>                 |                           |                         |                  |
| Jaks et al., 2008, Nature Genetics | Lgr5-CreER <sup>T2</sup>  | 0.5 mg/mouse            | P21              |
| Snippert et al., 2010, Science     | Lgr6-CreER <sup>T2</sup>  | 2 mg/mouse              | Adult            |
| <b><i>Intestine</i></b>            |                           |                         |                  |
| Barker et al., 2007, Nature        | Lgr5-CreER <sup>T2</sup>  | 2 mg/mouse              | Adult            |
| Yan et al., 2012, PNAS             | Lgr5-CreER <sup>T2</sup>  | 5 mg/mouse              | Adult            |
|                                    | Bmi1-CreER                | 5 mg/mouse              | Adult            |
