# Supplementary material for: The influence of tamoxifen on normal mouse mammary gland homeostasis
Source: Springer Nature journal article supplement (doi:10.1186/s13058-014-0411-0), 2014-07-23

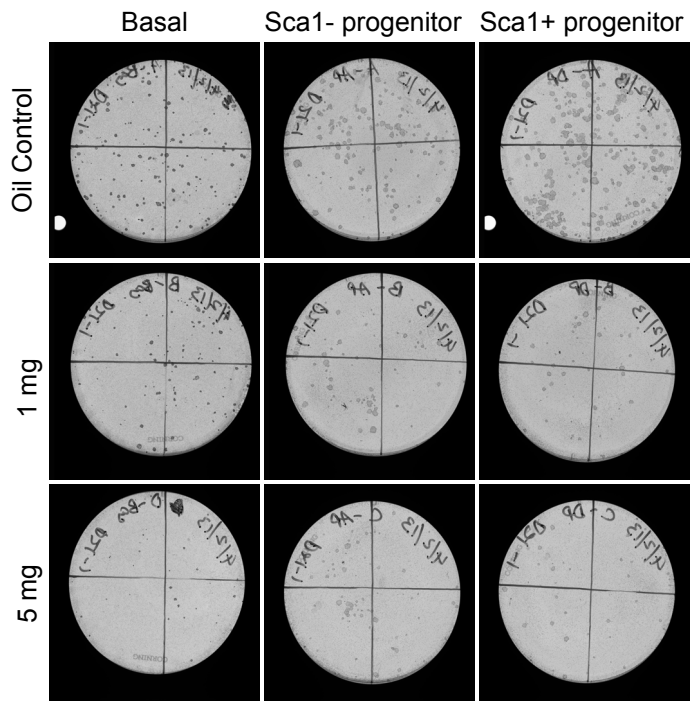

Supplement: MOESM5 [file 9781116]
