# Supplementary material for: The influence of tamoxifen on normal mouse mammary gland homeostasis
Source: Springer Nature journal article supplement (doi:10.1186/s13058-014-0411-0), 2014-07-23
Supplement: MOESM7 [file 9781116]

**Table S3 :**  
**Distribution of**  
**mice in different**  
**stages of the**  
**estrus cycle post-**  
**tamoxifen**  
**treatment.**

| Time point | Dose                                    | Estrus stage                                                                                                                                                     |
|------------|-----------------------------------------|------------------------------------------------------------------------------------------------------------------------------------------------------------------|
| Day 1      | Oil<br>1 mg<br>5 mg                     | P, P, E, M, D<br>E, E, P/E, M, M<br>E, P, D, M, D                                                                                                                |
| Day 2      | Oil<br>1 mg<br>5 mg                     | M, E, D, E, D<br>E, P/E, M, E, E<br>E, P, E, M, E                                                                                                                |
| Day 3      | Oil<br>0.2 mg<br>1 mg<br>5 mg<br>3*5 mg | E, E/M, P, E/M, M, M, M, D, M<br>E, E/M, E, E/M, E, M, E/M<br>E, M, E, E, P, E, E, M, P<br>E, E, E, E/M, E/M, E/M, E, P, M, M<br>P, M, M, M, M, P, M, M, M, M, M |
| Day 7      | Oil<br>0.2 mg<br>1 mg<br>5 mg<br>3*5 mg | M, D, E, E, E, M, D, D, E<br>M, D, M, P, M, M, D<br>M, P/E, M, E, M, M/D, M, P, M<br>M, M, M, M, M, M, E/M, M, M, M, M<br>P, P/E, P/E, E, E/M, E/M, M, M, M      |
| Day 21     | Oil<br>0.2 mg<br>1 mg<br>5 mg<br>3*5 mg | M, M, E, D, D, P, M, D, P<br>E/M, E, E, D, M, D<br>E, M, P, P, P, E, P, M, E<br>P, D, E, E, M, M, D, D, E, M<br>M, E/M, D, D, M, M, M, M, M, M, M                |

} P = 0.060

} P = 0.070
